# Supplementary material for: Sb nanosheet modified separator for Li–S batteries with excellent electrochemical performance
Source: Royal Society of Chemistry journal article supplement (doi:10.1039/d0ra10100a), 2021-01-01
Supplement: d0ra10100a1.pdf [file d0ra10100a1.pdf]

## Supporting Information

### Sb nanosheets modified separator for Li-S batteries with excellent electrochemical performance

Linchao Zeng <sup>a,b</sup>, Jianhui Zhu <sup>a,c</sup>, Minsu Liu <sup>b</sup>, and Peixin Zhang <sup>\*a</sup>

<sup>a</sup> College of Chemistry and Environmental Engineering, Shenzhen University, Shenzhen 518060, P. R. China

<sup>b</sup> Shenzhen Geim Graphene Center, Tsinghua-Berkeley Shenzhen Institute, Tsinghua University, Shenzhen 518055, P. R. China

<sup>c</sup> College of Materials Science and Engineering, Xi'an University of Architecture and Technology, Xi'an, Shannxi 710055, P.R. China

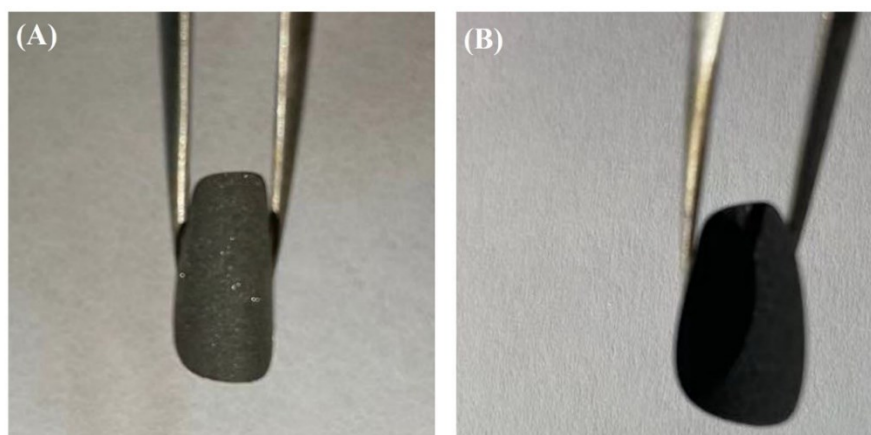

**Fig. S1.** Photograph of Sb/separator (A) and Graphene/separator (B).

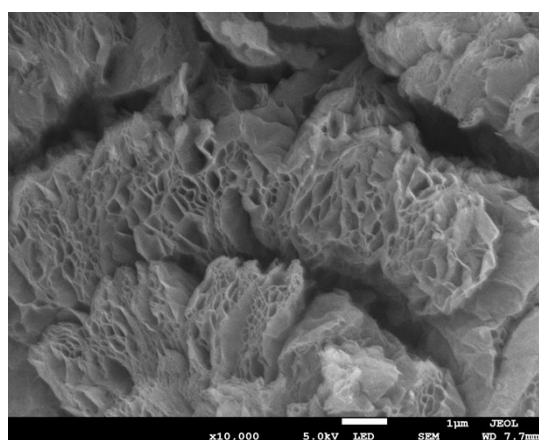

**Fig. S2.** SEM image of the graphene.

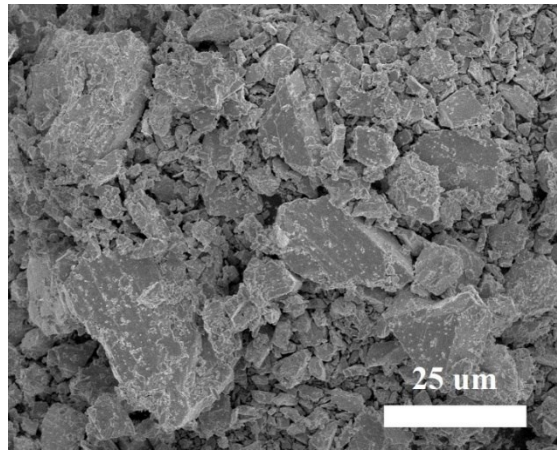

**Fig. S3.** FESEM image of the pristine Sb powder.

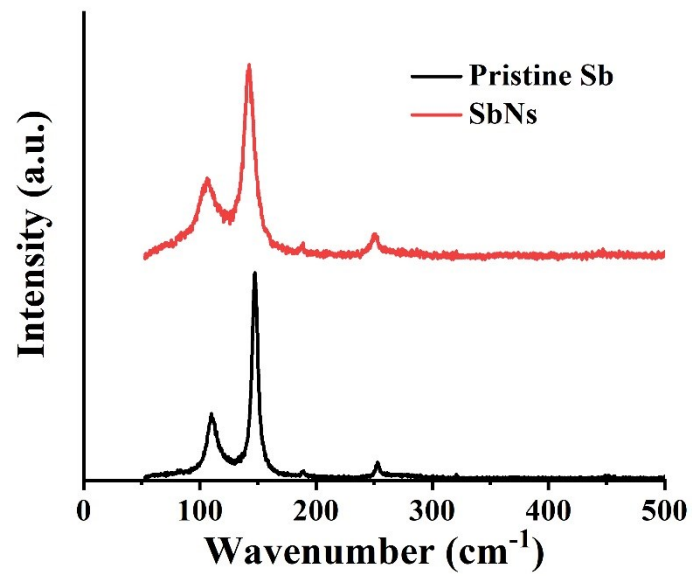

**Fig. S4.** Raman spectra of the pristine Sb and SbNs powders.

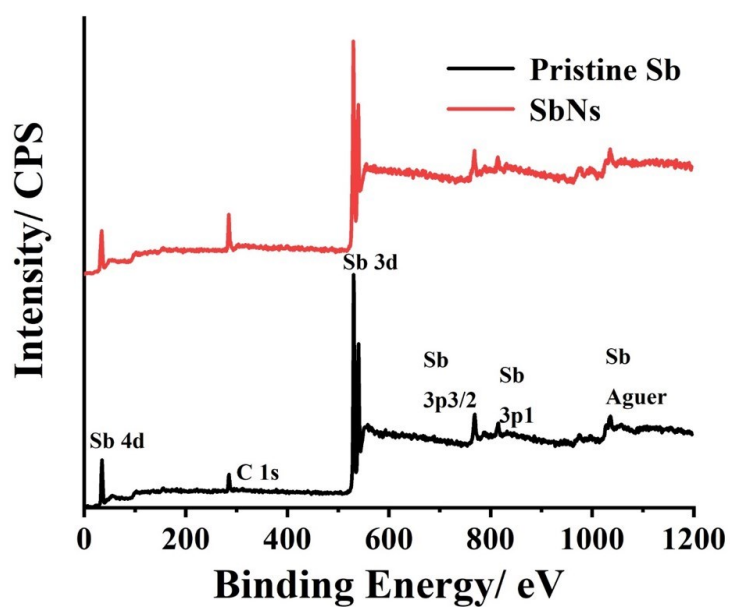

**Fig. S5.** XPS spectra of the pristine Sb and SbNs powders.

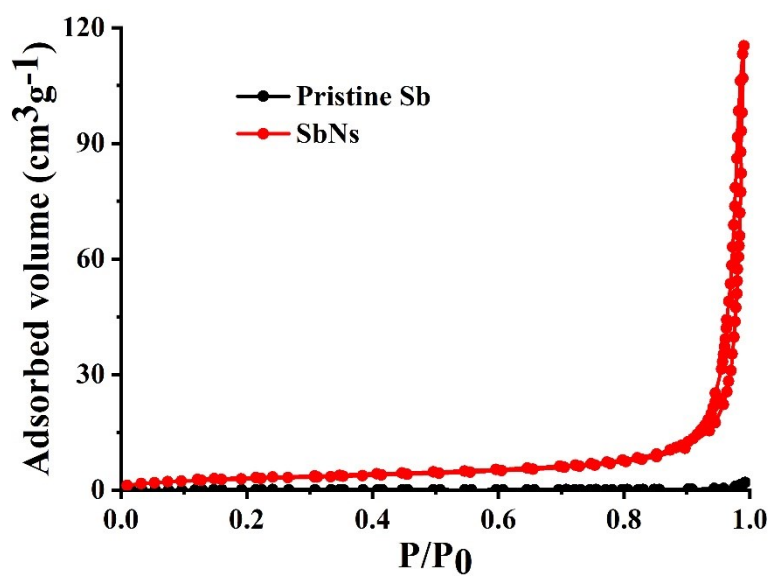

**Fig. S6.** N<sub>2</sub> adsorption/desorption isotherms of pristine Sb and SbNs powders.

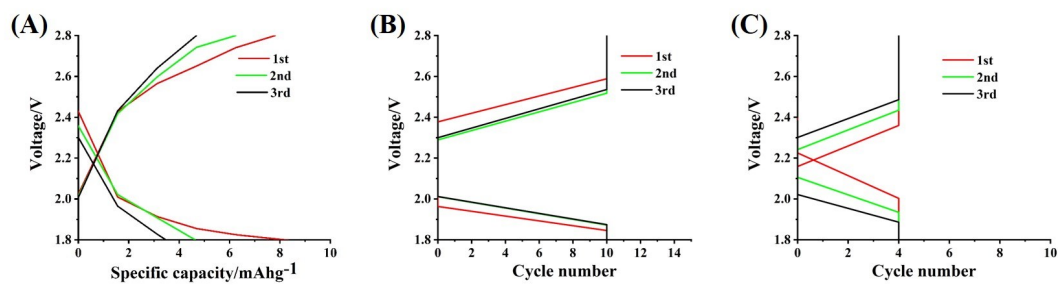

**Fig. S7.** Galvanostatic discharge-charge curves of SbNs (A), Sb (B) and graphene (C) in the voltage range of 1.8-2.8 V at a current density of 0.1 A g<sup>-1</sup>.

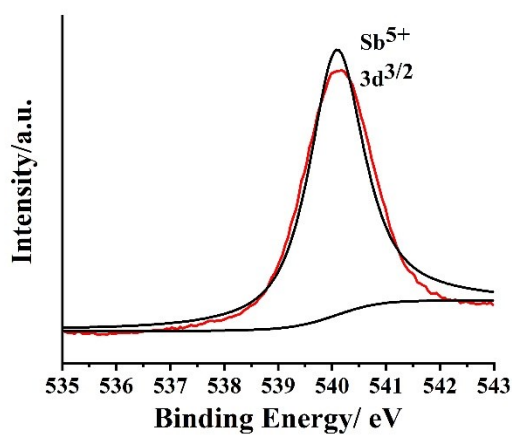

**Fig. S8.** Sb 3d high-resolution XPS spectra of SbNs after electrochemical cycling in Li-S batteries.

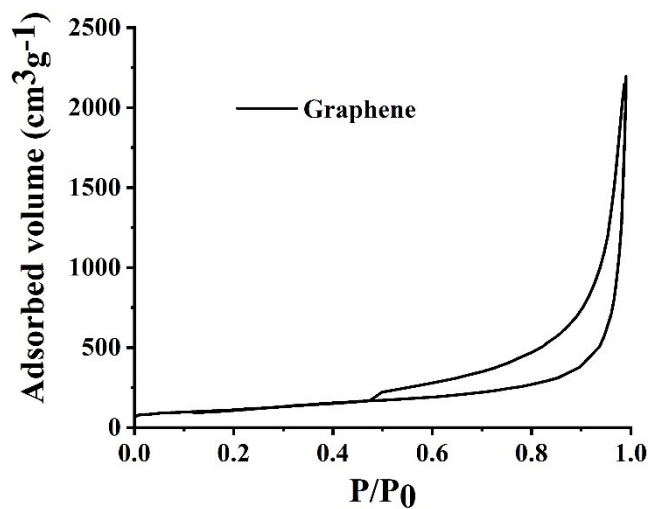

**Fig. S9.** N<sub>2</sub> adsorption/desorption isotherms of graphene.

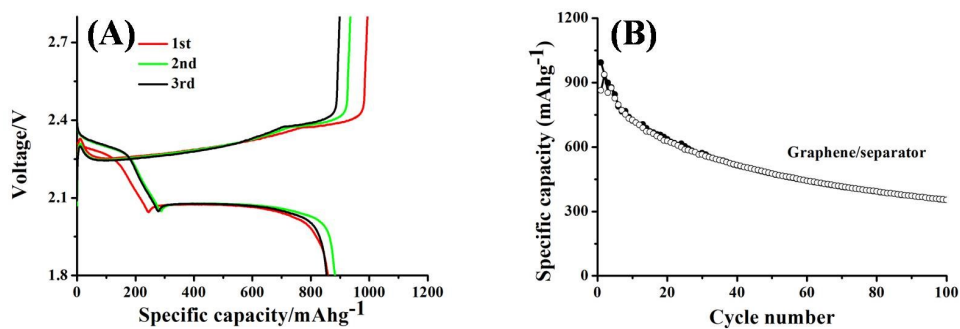

**Fig. S10.** (A) Initial three charge/discharge profiles of Li-S battery using Graphene/separator at a current density of  $0.1 \text{ A g}^{-1}$ . (B) Charge-discharge capacities of Li-S batteries using Graphene/separator at a current density of  $0.1 \text{ A g}^{-1}$ .

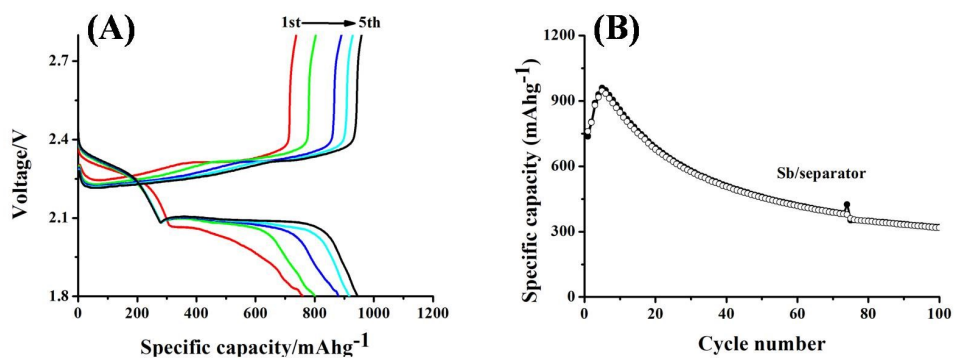

**Fig. S11.** (A) Initial five charge/discharge profiles of Li-S battery using Sb/separator at a current density of  $0.1 \text{ A g}^{-1}$ . (B) Charge-discharge capacities of Li-S batteries using Sb/separator at a current density of  $0.1 \text{ A g}^{-1}$ .

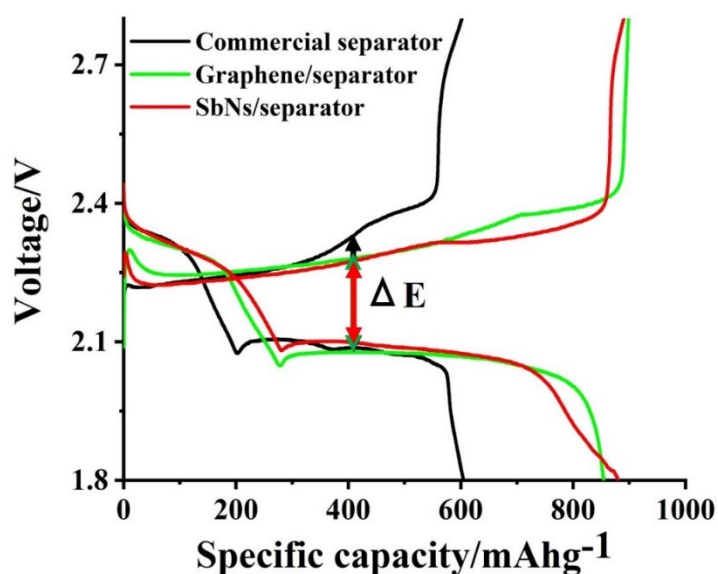

**Fig. S12.** Polarization voltages of Li-S batteries using SbNs/separator, Graphene/separator and pristine separator.

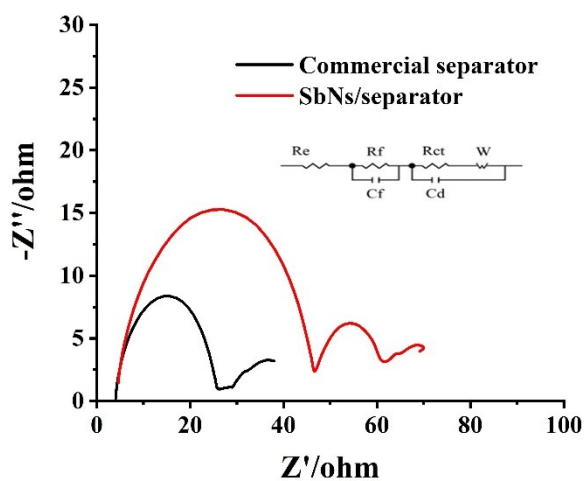

**Fig. S13.** Electrochemical impedance spectrum of symmetric batteries with Li foil and commercial separator (or SbNs/separator). The  $R_f$  of symmetric battery with Li foil and SbNs/separator is a little larger than that of symmetric battery with Li foil and commercial separator, indicating the electrochemical impedance value of SbNs/separator is a little larger than that of commercial separator.

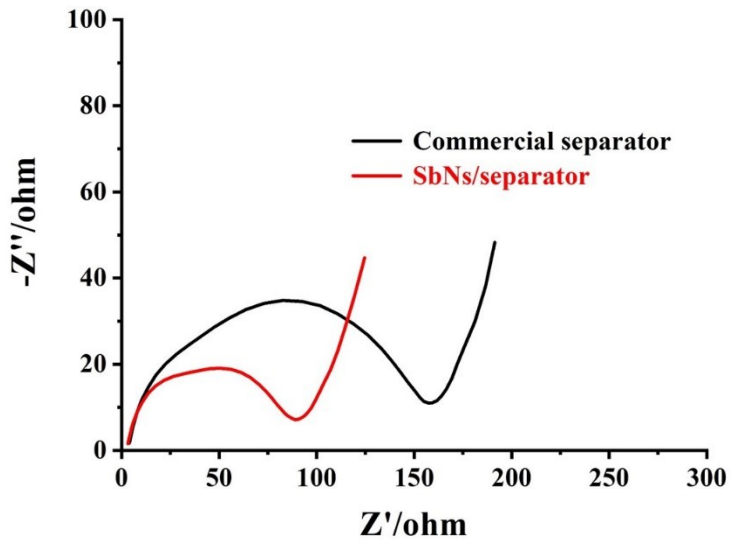

**Fig. S14.** AC impedance spectra of Li-S batteries using SbNs/separator (or pristine separator) as separator (discharged to 1.8 V after 10 cycles at  $0.1 \text{ A g}^{-1}$ ).

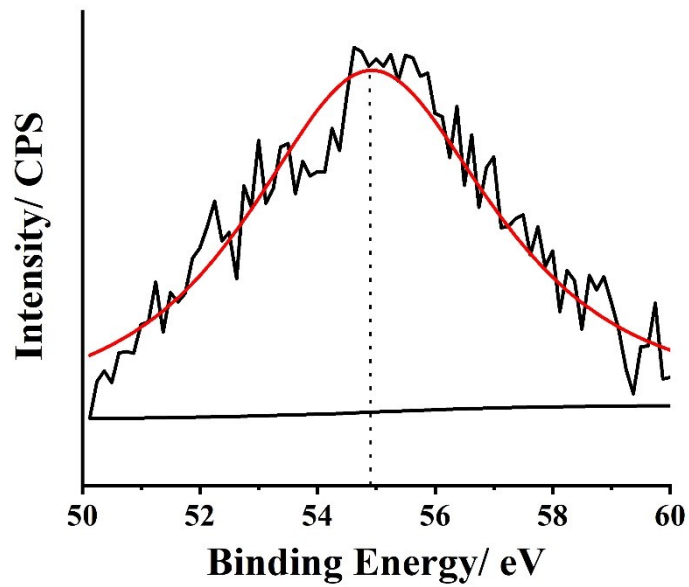

**Fig. S15.** The Li 1s XPS spectra of SbNs-Li<sub>2</sub>S<sub>6</sub> composite.
